1 Cloning of Nine Glucocorticoid Receptor Isoforms from the Slender African lungfish

2 (*Protopterus dolloi*)

3 Yoshinao Katsu<sup>1,2</sup>, Shin Oana<sup>2</sup>, Xiaozhi Lin<sup>2</sup>, Susumu Hyodo<sup>3</sup>,

4 Laurent Bianchetti<sup>4</sup>, Michael E. Baker<sup>5,6</sup>

5 <sup>1</sup>Graduate School of Life Science

6 Hokkaido University

7 Sapporo, Japan

8 <sup>2</sup>Faculty of Science

9 Hokkaido University

10 Sapporo, Japan

11 <sup>3</sup>Laboratory of Physiology

12 Atmosphere and Ocean Research Institute

13 University of Tokyo

14 Chiba, Japan

15 <sup>4</sup>Institute of Genetics and Molecular and Cellular Biology (IGBMC),

16 CNRS UMR 7104 - Inserm U1258

17 Université de Strasbourg

18 67404 Illkirch, France

19 <sup>5</sup>Division of Nephrology-Hypertension

20 Department of Medicine, 0693

21 University of California, San Diego

22 9500 Gilman Drive

23 La Jolla, CA 92093-0693

24 <sup>6</sup>Center for Academic Research and Training in Anthropogeny (CARTA)

25 University of California, San Diego

26 La Jolla, CA 92093

27  
28 Correspondence to:

29 Y. Katsu: [ykatsu@sci.hokudai.ac.jp](mailto:ykatsu@sci.hokudai.ac.jp)

30 M. E. Baker: [mbaker@health.ucsd.edu](mailto:mbaker@health.ucsd.edu)

31 **ABSTRACT.** We wanted to clone the glucocorticoid receptor (GR) from slender African  
32 lungfish (*Protopterus dolloi*) for comparison to *P. dolloi* MR, which we had cloned and were  
33 characterizing, as well as for comparison to the GRs from humans, elephant shark and zebrafish.  
34 However, although sequencing of the genome of the Australian lungfish (*Neoceratodus forsteri*),  
35 as well as, that of the West African lungfish (*Protopterus annectens*) were reported in the first  
36 three months of 2021, we could not retrieve a GR sequence with a BLAST search of GenBank,  
37 when we submitted our research for publication in July 2021. Moreover, we were unsuccessful  
38 in cloning the GR from slender African lungfish using a cDNA from the ovary of *P. dolloi* and  
39 PCR primers that had successfully cloned a GR from elephant shark, *Xenopus* and gar GRs. On  
40 October 21, 2021 the nucleotide sequence of West African lungfish (*P. annectens*) GR was  
41 deposited in GenBank. We used this GR sequence to construct PCR primers that successfully  
42 cloned the GR from the slender spotted lungfish. Here, we report the sequences of nine *P. dolloi*  
43 GR isoforms and explain the basis for the previous failure to clone a GR from slender African  
44 lungfish using PCR primers that cloned the GR from elephant shark, *Xenopus* and gar. Studies  
45 are underway to determine corticosteroid activation of these slender African lungfish GRs.

46

47 Key words: glucocorticoid receptor, lungfish, evolution, slender spotted African lungfish.

48

## 49 **1. INTRODUCTION**

50 The glucocorticoid receptor (GR) belongs to the nuclear receptor family, a diverse group  
51 of transcription factors that arose in multicellular animals [1–4]. The GR has many key roles in  
52 the physiology of humans and other terrestrial vertebrates and fish [5–8]. Important for  
53 understanding the function of the GR is that it is closely related to the mineralocorticoid receptor  
54 (MR) [9–11]. These two steroid receptors evolved from a duplication of an ancestral corticoid  
55 receptor (CR) in a jawless fish (cyclostome), which has descendants in modern lampreys and  
56 hagfish [11–13]. A distinct GR and MR first appear in cartilaginous fishes (Chondrichthyes)  
57 [1,9,11,14,15], which diverged from bony vertebrates about 450 million years ago [16,17].

58 Lungfish are important in the transition of vertebrates from water to land [18–22], and  
59 aldosterone activation of the MR is important in this process [11,22–25]. Aldosterone, the main  
60 physiological mineralocorticoid in humans and other terrestrial vertebrates [26–29], first appears

61 in lungfish [21–23]. To investigate the origins of aldosterone signaling, we cloned the MR from  
62 slender spotted African lungfish (*P. dolloi*) and studied its activation by aldosterone, other  
63 corticosteroids and progesterone [30]. To continue our investigation of early events in the  
64 evolution of the GR and MR, we sought to clone the *P. dolloi* GR for comparison with *P. dolloi*  
65 MR, as well as with the GR in coelacanth, zebrafish and humans. However, a BLAST search  
66 with the sequence of the GR from coelacanth and zebrafish did not retrieve the sequence of *P.*  
67 *dolloi* GR or any other lungfish GR from GenBank. Nor could we clone the *P. dolloi* GR using a  
68 cDNA from *P. dolloi* ovary using PCR primers that had successfully cloned a GR from elephant  
69 shark GR [15] and chicken, alligator and frog GRs [31]. Fortunately, on October 21, 2021 the  
70 nucleotide sequence of African lungfish (*P. annectens*) GR was deposited in GenBank, which  
71 gave us sufficient information for PCR primers to clone nine isoforms of *P. dolloi* GR. Here we  
72 report the sequences of these nine *P. dolloi* GR isoforms and explain the basis for the previous  
73 failure to clone a GR from slender African lungfish using PCR primers that previously cloned  
74 the GR from elephant shark, *Xenopus* and gar [15,31,32]. Our analysis of these nine GR  
75 sequences indicates that they evolved by alternative splicing and gene duplication [33,34].

76

## 77 **2. Results and Discussion.**

### 78 **2A. Multiple sequence alignment of nine *P. dolloi* GR isoforms.**

79 Figure 1 shows a multiple sequence alignment of the nine isoforms of *P. dolloi* GR. The  
80 nine *P. dolloi* GRs cluster into three groups: group I (GR-A1, GR-A2), group II (GR-B1, GR-B2,  
81 GR-B3) and group III (GR-C1, GR-C2, GR-C3, GR-C4). GR-A2 begins at “MMDP”, a  
82 sequence motif that is conserved in all nine GRs.

83 The multiple alignment reveals that these nine slender African lungfish GRs evolved  
84 through alternative splicing and gene duplications (Figure 1). GR-A2 appears to be a product of  
85 alternative splicing of GR-A1. GR-C4 appears to be a product of alternative splicing of one or

86 more GR-C isoforms, which supports a GR gene duplication in *P. dolloi* genome. There also is  
87 evidence for gene duplications among the *P. dolloi* GRs. MLSE at the beginning of GR-A1 is  
88 conserved in GR-B2 and GR-C2. A closely following YAPAD sequence is conserved in all *P.*  
89 *dolloi* GR isoforms. Fifteen of the first sixteen amino acids at the amino terminus of GR-A-1 are  
90 conserved in GR-B2 and GR-C2 (Figure 1A). This amino acid sequence is highly conserved in  
91 the other seven GRs. The rest of GR-A2 beginning at MMDPAGALNSLNGTQSLNKY is  
92 identical in GR-A1, and this amino acid sequence is highly conserved in the other seven GRs.  
93 MPFESLKYYAPAD is conserved at the beginning of GR-B3 and GR-C3. Beginning at the  
94 conserved MMDP sequence in the N-terminal domain, the two GR-A isoforms differ at 55  
95 positions from the three GR-B and the four GR-C isoforms.  
96

**NTD**

GR-A1 MLSEARIARKDYAPADMMDPAGSLNSLNGTQSLKYVERS DKTS 43  
 GR-A2 MMDPAGSLNSLNGTQSLKYVERS DKTS 27  
 GR-B1 MSVWHE SRHDTDWDVCSLKFNR CGLHLDYAPADMMDPAGSLNSLNGTQSLKY AERSDKTS 60  
 GR-B2 MLSEVRITRKDYAPADMMDPAGSLNSLNGTQSLKY AERSDKTS 43  
 GR-B3 MPFESLKYYPADMMMDPAGSLNSLNGTQSLKY AERSDKTS 40  
 GR-C1 MSVWHE SRHDTDWDVCSPKFNR CGLHLDYAPADMMDPAGSLNSLNGTQSLKY AERSDKTS 60  
 GR-C2 MLSEVRITRKDYAPADMMDPAGSLNSLNGTQSLKY AERSDKTS 43  
 GR-C3 MPFESLKYYPADMMMDPAGSLNSLNGTQSLKY AERSDKTS 40  
 GR-C4 MMDPAGSLNSLNGTQSLKY AERSDKTS 27  
 \*\*\*\*\*

GR-A1 SGYPFNPICRGGAGATVTIISTSPSRQ TSAQLDAKQFTCDISNGLGRNDSSRDPSKAVSLS 103  
 GR-A2 SGYPFNPICRGGAGATVTIISTSPSRQ TSAQLDAKQFTCDISNGLGRNDSSRDPSKAVSLS 87  
 GR-B1 SGYPFNPICGGGAGATVTVSASPSRQASAQLECKQFTCDISNGLGRNASTRDPSKAVSLS 120  
 GR-B2 SGYPFNPICGGGAGATVTVSASPSRQASAQLECKQFTCDISNGLGRNASTRDPSKAVSLS 103  
 GR-B3 SGYPFNPICGGGAGATVTVSASPSRQASAQLECKQFTCDISNGLGRNASTRDPSKAVSLS 100  
 GR-C1 SGYPFNPICGGGAGATVTVSASPSRQASAQLECKQFTCDISNGLGRNASTRDPSKAVSLS 120  
 GR-C2 SGYPFNPICGGGAGATVTVSASPSRQASAQLECKQFTCDISNGLGRNASTRDPSKAVSLS 103  
 GR-C3 SGYPFNPICGGGAGATVTVSASPSRQASAQLECKQFTCDISNGLGRNASTRDPSKAVSLS 100  
 GR-C4 SGYPFNPICGGGAGATVTVSASPSRQASAQLECKQFTCDISNGLGRNASTRDPSKAVSLS 87  
 \*\*\*\*\*

GR-A1 MGFYMGEVNSKAAGTDFGSOQQOQSCVSSAENDFFLLEESLANLNRDAGTEASFLSAET 163  
 GR-A2 MGFYMGEVNSKAAGTDFGSOQQOQSCVSSAENDFFLLEESLANLNRDAGTEASFLSAET 147  
 GR-B1 MGFYMGEVNSKAAGT GFGCQQQEQQSCVSSAENDFFLLEESLANLNRDA ETEASFLNAET 180  
 GR-B2 MGFYMGEVNSKAAGT GFGCQQQEQQSCVSSAENDFFLLEESLANLNRDA ETEASFLNAET 163  
 GR-B3 MGFYMGEVNSKAAGT GFGCQQQEQQSCVSSAENDFFLLEESLANLNRDA ETEASFLNAET 160  
 GR-C1 MGFYMGEVNSKAAGT GFGCQQQEQQSCVSSAENDFFLLEESLANLNRDA ETEASFLNAET 180  
 GR-C2 MGFYMGEVNSKAAGT GFGCQQQEQQSCVSSAENDFFLLEESLANLNRDA ETEASFLNAET 163  
 GR-C3 MGFYMGEVNSKAAGT GFGCQQQEQQSCVSSAENDFFLLEESLANLNRDA ETEASFLNAET 160  
 GR-C4 MGFYMGEVNSKAAGT GFGCQQQEQQSCVSSAENDFFLLEESLANLNRDA ETEASFLNAET 147  
 \*\*\*\*\*

GR-A1 ADSLARGQDFLAMGKTDFPSEQETFSHLGGSDTNGTSRFLSDDQNSFDIFPELSLQTDSP 223  
 GR-A2 ADSLARGQDFLAMGKTDFPSEQETFSHLGGSDTNGTSRFLSDDQNSFDIFPELSLQTDSP 207  
 GR-B1 TDSLARGQDF SAMGKSDFPSEQETFS QIGVSDPNGTSRFLSDDQNSFDIFPELSLQTDSP 239  
 GR-B2 TDSLARGQDF SAMGKSDFPSEQETFS QIGVSDPNGTSRFLSDDQNSFDIFPELSLQTDSP 223  
 GR-B3 TDSLARGQDF SAMGKSDFPSEQETFS QIGVSDPNGTSRFLSDDQNSFDIFPELSLQTDSP 219  
 GR-C1 TDSLARGQDF SAMGKSDFPSEQETFS QIGVSDPNGTSRFLSDDQNSFDIFPELSLQTDSP 239  
 GR-C2 TDSLARGQDF SAMGKSDFPSEQETFS QIGVSDPNGTSRFLSDDQNSFDIFPELSLQTDSP 222  
 GR-C3 TDSLARGQDF SAMGKSDFPSEQETFS QIGVSDPNGTSRFLSDDQNSFDIFPELSLQTDSP 219  
 GR-C4 TDSLARGQDF SAMGKSDFPSEQETFS QIGVSDPNGTSRFLSDDQNSFDIFPELSLQTDSP 206  
 \*\*\*\*\*

GR-A1 GRITDGSPWNLETFCDDEDDGGAGLSPLLDNAISEPGLNNEECRGLVGNNMFDVKNNEC 283  
 GR-A2 GRITDGSPWNLETFCDDEDDGGAGLSPLLDNAISEPGLNNEECRGLVGNNMFDVKNNEC 267  
 GR-B1 GRITDGSPWNLETFCDDEDD -GAGLSPLPIDNAISEAGGLSEECRGLVGNNNFVKNND 299  
 GR-B2 GRITDGSPWNLETFCDDEDD -GAGLSPLPIDNAISEAGGLSEECRGLVGNNNFVKNND 283  
 GR-B3 GRITDGSPWNLETFCDDEDD -GAGLSPLPIDNAISEAGGLSEECRGLVGNNNFVKNND 279  
 GR-C1 GRITDGSPWNLETFCDDEDD -GAGLSPLPIDNAISEAGGLSEECRGLVGNNNFVKNND 299  
 GR-C2 GRITDGSPWNLETFCDDEDD -GAGLSPLPIDNAISEAGGLSEECRGLVGNNNFVKNND 282  
 GR-C3 GRITDGSPWNLETFCDDEDD -GAGLSPLPIDNAISEAGGLSEECRGLVGNNNFVKNND 279  
 GR-C4 GRITDGSPWNLETFCDDEDD -GAGLSPLPIDNAISEAGGLSEECRGLVGNNNFVKNND 266  
 \*\*\*\*\*

GR-A1 HDSQMPSTSAELPQVKREKESYIELVTPGVIKQEQLSRGFCQASSSEFDAPAPISIHGVS 343  
 GR-A2 HDSQMPSTSAELPQVKREKESYIELVTPGVIKQEQLSRGFCQASSSEFDAPAPISIHGVS 327  
 GR-B1 HVSQMPSTSAELPQVKREKESYIELVTPGVIKQEQLNRFQASSSEFDA TATISIHGVS 359  
 GR-B2 HVSQMPSTSAELPQVKREKESYIELVTPGVIKQEQLNRFQASSSEFDA TATISIHGVS 342  
 GR-B3 HVSQMPSTSAELPQVKREKESYIELVTPGVIKQEQLNRFQASSSEFDA TATISIHGVS 339  
 GR-C1 HVSQMPSTSAELPQVKREKESYIELVTPGVIKQEQLNRFQASSSEFDA TATISIHGVS 359  
 GR-C2 HVSQMPSTSAELPQVKREKESYIELVTPGVIKQEQLNRFQASSSEFDA TATISIHGVS 342  
 GR-C3 HVSQMPSTSAELPQVKREKESYIELVTPGVIKQEQLNRFQASSSEFDA TATISIHGVS 339  
 GR-C4 HVSQMPSTSAELPQVKREKESYIELVTPGVIKQEQLNRFQASSSEFDA TATISIHGVS 326  
 \*\*\*\*\*

GR-A1 TSGGQSYCYGVNNSPRSQHODQKPVFTFIPFPTAIGNNRSRCQGSSENPSLSPLTTGSYA 403  
 GR-A2 TSGGQSYCYGVNNSPRSQHODQKPVFTFIPFPTAIGNNRSRCQGSSENPSLSPLTTGSYA 387  
 GR-B1 TSGGQSYCYGV DSSPCSQQKDKQKPVFTFIPFPTAIGNNRSRCLGSSDSSSLSPLTAGSYT 419  
 GR-B2 TSGGQSYCYGV DSSPCSQQKDKQKPVFTFIPFPTAIGNNRSRCLGSSDSSSLSPLTAGSYT 403  
 GR-B3 TSGGQSYCYGV DSSPCSQQKDKQKPVFTFIPFPTAIGNNRSRCLGSSDSSSLSPLTAGSYT 399  
 GR-C1 TSGGQSYCYGV DSSPCSQQKDKQKPVFTFIPFPTAIGNNRSRCLGSSDSSSLSPLTAGSYT 419  
 GR-C2 TSGGQSYCYGV DSSPCSQQKDKQKPVFTFIPFPTAIGNNRSRCLGSSDSSSLSPLTAGSYT 402  
 GR-C3 TSGGQSYCYGV DSSPCSQQKDKQKPVFTFIPFPTAIGNNRSRCLGSSDSSSLSPLTAGSYT 399  
 GR-C4 TSGGQSYCYGV DSSPCSQQKDKQKPVFTFIPFPTAIGNNRSRCLGSSDSSSLSPLTAGSYT 386  
 \*\*\*\*\*

GR-A1 GVSGFISSTGTALKINSSPPSGTSSSPGPPAKV 438  
 GR-A2 GVSGFISSTGTALKINSSPPSGTSSSPGPPAKV 422  
 GR-B1 GVSGFISSTGTATA VKTNSNSPPSGTLSSPGPPAKV 454  
 GR-B2 GVSGFISSTGTATA VKTNSNSPPSGTLSSPGPPAKV 437  
 GR-B3 GVSGFISSTGTATA VKTNSNSPPSGTLSSPGPPAKV 434  
 GR-C1 GVSGFISSTGTATA VKTNSNSPPSGTSSSPGPPAKV 454  
 GR-C2 GVSGFISSTGTATA VKTNSNSPPSGTSSSPGPPAKV 437  
 GR-C3 GVSGFISSTGTATA VKTNSNSPPSGTSSSPGPPAKV 434  
 GR-C4 GVSGFISSTGTATA VKTNSNSPPSGTSSSPGPPAKV 421  
 \*\*\*\*\*

98  
99

**DBD**

```
GR-A1 439 CLVCSDEASGCHYGVLTCGSKVFFKRAVEGQHNYLCAGRNDICI IDKIRRNKCPACRYRK  
GR-A2 423 CLVCSDEASGCHYGVLTCGSKVFFKRAVEGQHNYLCAGRNDICI IDKIRRNKCPACRYRK  
GR-B1 455 CLVCSDEASGCHYGVLTCGSKVFFKRAVEGQHNYLCAGRNDICI IDKIRRNKCPACR FRK  
GR-B2 438 CLVCSDEASGCHYGVLTCGSKVFFKRAVEGQHNYLCAGRNDICI IDKIRRNKCPACR FRK  
GR-B3 435 CLVCSDEASGCHYGVLTCGSKVFFKRAVEGQHNYLCAGRNDICI IDKIRRNKCPACR FRK  
GR-C1 455 CLVCSDEASGCHYGVLTCGSKVFFKRAVEGQHNYLCAGRNDICI IDKIRRNKCPACR FRK  
GR-C2 438 CLVCSDEASGCHYGVLTCGSKVFFKRAVEGQHNYLCAGRNDICI IDKIRRNKCPACR FRK  
GR-C3 435 CLVCSDEASGCHYGVLTCGSKVFFKRAVEGQHNYLCAGRNDICI IDKIRRNKCPACR FRK  
GR-C4 422 CLVCSDEASGCHYGVLTCGSKVFFKRAVEGQHNYLCAGRNDICI IDKIRRNKCPACR FRK  
*****
```

**hinge**

```
GR-A1 499 CLOAGMNL D A R K S K K K M K G I Q O P N E P S V A N P A S E T A N K A L L P T S L P Q L T P T I I N L L E V I  
GR-A2 483 CLOAGMNL D A R K S K K K M K G I Q O P N E P S V A N P A S E T A N K A L L P T S L P Q L T P T I I N L L E V I  
GR-B1 515 CLOAGMNL D A R K S K K K M K G I Q O P N E P L V A K P A S E S T T N K A L L P T S L P Q L T P T I I N L L E V I  
GR-B2 498 CLOAGMNL D A R K S K K K M K G I Q O P N E P L V A K P A S E S T T N K A L L P T S L P Q L T P T I I N L L E V I  
GR-B3 495 CLOAGMNL D A R K S K K K M K G I Q O P N E P L V A K P A S E S T T N K A L L P T S L P Q L T P T I I N L L E V I  
GR-C1 515 CLOAGMNL D A R K S K K K M K G I Q O P N E P L V A K P A S E S T T N K A L L P T S L P Q L T P T I I N L L E V I  
GR-C2 498 CLOAGMNL D A R K S K K K M K G I Q O P N E P L V A K P A S E S T T N K A L L P T S L P Q L T P T I I N L L E V I  
GR-C3 495 CLOAGMNL D A R K S K K K M K G I Q O P N E P L V A K P A S E S T T N K A L L P T S L P Q L T P T I I N L L E V I  
GR-C4 482 CLOAGMNL D A R K S K K K M K G I Q O P N E P L V A K P A S E S T T N K A L L P T S L P Q L T P T I I N L L E V I  
*****
```

**LBD**

```
GR-A1 543 EPDVIYAGYDSTSPDTS PRLMSAMNTLGGROVVAAVKWAKSLPGFRNMP LDDQMSLIQYS  
GR-A2 513 EPDVIYAGYDSTSPDTS PRLMSAMNTLGGROVVAAVKWAKSLPGFRNMP LDDQMSLIQYS  
GR-B1 575 EPDVIYAGYDSTSPDTS SRLMSAMNTLGGROVVAAVKWAKSLPGFRN LPLDDQMSLIQYS  
GR-B2 558 EPDVIYAGYDSTSPDTS SRLMSAMNTLGGROVVAAVKWAKSLPGFRN LPLDDQMSLIQYS  
GR-B3 555 EPDVIYAGYDSTSPDTS SRLMSAMNTLGGROVVAAVKWAKSLPGFRN LPLDDQMSLIQYS  
GR-C1 575 EPDVIYAGYDSTSPDTS SRLMSAMNTLGGROVVAAVKWAKSLPGFRN LPLDDQMSLIQYS  
GR-C2 558 EPDVIYAGYDSTSPDTS SRLMSAMNTLGGROVVAAVKWAKSLPGFRN LPLDDQMSLIQYS  
GR-C3 555 EPDVIYAGYDSTSPDTS SRLMSAMNTLGGROVVAAVKWAKSLPGFRN LPLDDQMSLIQYS  
GR-C4 542 EPDVIYAGYDSTSPDTS SRLMSAMNTLGGROVVAAVKWAKSLPGFRN LPLDDQMSLIQYS  
*****
```

```
GR-A1 619 WMFLMTFGLGWRSYKQSSGTMLCYAPDLVITEERMRLPYMMEHCHHLIRIAQAFQLOIT  
GR-A2 603 WMFLMTFGLGWRSYKQSSGTMLCYAPDLVITEERMRLPYMMEHCHHLIRIAQAFQLOIT  
GR-B1 635 WMFLMTFGLGWRSYKQSSGTMLCYAPDLVITEERMRLPYMMEHCHHLI KIAQAFQLEIT  
GR-B2 618 WMFLMTFGLGWRSYKQSSGTMLCYAPDLVITEERMRLPYMMEHCHHLI KIAQAFQLEIT  
GR-B3 615 WMFLMTFGLGWRSYKQSSGTMLCYAPDLVITEERMRLPYMMEHCHHLI KIAQAFQLEIT  
GR-C1 635 WMFLMTFGLGWRSYKQSSGT VLCYAPDLVITEERMRLPYMMEHCHHLI KIAQAFQLEIT  
GR-C2 618 WMFLMTFGLGWRSYKQSSGT VLCYAPDLVITEERMRLPYMMEHCHHLI KIAQAFQLEIT  
GR-C3 615 WMFLMTFGLGWRSYKQSSGT VLCYAPDLVITEERMRLPYMMEHCHHLI KIAQAFQLEIT  
GR-C4 602 WMFLMTFGLGWRSYKQSSGT VLCYAPDLVITEERMRLPYMMEHCHHLI KIAQAFQLEIT  
*****
```

```
GR-A1 679 FEEYLCMKALLLLSTIPKEGLKSOAVFEEIRMTYIKELGKAI VOKERSSTQNWORFFOLT  
GR-A2 663 FEEYLCMKALLLLSTIPKEGLKSOAVFEEIRMTYIKELGKAI VOKERSSTQNWORFFOLT  
GR-B1 695 FEEYLCMKALLLLSTVPKEGLKSOAVFEEIRMTYIKELGKAI VOKERSSTQNWORFFOLT  
GR-B2 678 FEEYLCMKALLLLSTVPKEGLKSOAVFEEIRMTYIKELGKAI VOKERSSTQNWORFFOLT  
GR-B3 675 FEEYLCMKALLLLSTVPKEGLKSOAVFEEIRMTYIKELGKAI VOKERSSTQNWORFFOLT  
GR-C1 695 FEEYLCMKALLLLSTVPKEGLKSOAVFEEIRMTYIKELGKAI VOKERSSTQNWORFFOLT  
GR-C2 678 FEEYLCMKALLLLSTVPKEGLKSOAVFEEIRMTYIKELGKAI VOKERSSTQNWORFFOLT  
GR-C3 675 FEEYLCMKALLLLSTVPKEGLKSOAVFEEIRMTYIKELGKAI VOKERSSTQNWORFFOLT  
GR-C4 662 FEEYLCMKALLLLSTVPKEGLKSOAVFEEIRMTYIKELGKAI VOKERSSTQNWORFFOLT  
*****
```

```
GR-A1 739 KLLDSMHDVVAKVLNVCFQNFLDRSRCVEYPDMLQELITNQLPRIRSGNVKPLL FHQK 796  
GR-A2 723 KLLDSMHDVVAKVLNVCFQNFLDRSRCVEYPDMLQELITNQLPRIRSGNVKPLL FHQK 780  
GR-B1 755 KLLDSMHDVV SKVLNVCFQNFLDRSRCVEYPDMLQELITNQLPRIRSGNVKPLL FHQK 812  
GR-B2 738 KLLDSMHDVV SKVLNVCFQNFLDRSRCVEYPDMLQELITNQLPRIRSGNVKPLL FHQK 795  
GR-B3 735 KLLDSMHDVV SKVLNVCFQNFLDRSRCVEYPDMLQELITNQLPRIRSGNVKPLL FHQK 792  
GR-C1 755 KLLDSMHDVV TKVLNVCFQNFLDRSRCVEYPDMLQELITNQLPRIRSGNVKPLL FHQK 812  
GR-C2 738 KLLDSMHDVV TKVLNVCFQNFLDRSRCVEYPDMLQELITNQLPRIRSGNVKPLL FHQK 795  
GR-C3 735 KLLDSMHDVV TKVLNVCFQNFLDRSRCVEYPDMLQELITNQLPRIRSGNVKPLL FHQK 792  
GR-C4 722 KLLDSMHDVV TKVLNVCFQNFLDRSRCVEYPDMLQELITNQLPRIRSGNVKPLL FHQK 779  
*****
```

100  
101  
102  
103

**Fig 1b**



104 **Legend for**

105 **Figure 1A and 1B. Multiple Alignment of the amino acid sequences slender African**  
106 **lungfish glucocorticoid receptors.**

107 Total RNA was isolated from *P. dolloi* ovary and translated into cDNA. PCR was performed  
108 using four primer sets based on the sequence of *P. annectens* GR, as described in the Methods  
109 section. The amplified DNA fragments were sub-cloned into a vector for sequence analysis.  
110 Similar to other steroid receptors, slender African lungfish GR can be divided into four  
111 functional domains [6,8], consisting of a ligand-binding domain (LBD) at the C-terminus, a  
112 DNA-binding domain (DBD) in the center that is joined to the LBD by a short hinge domain  
113 (hinge), and a domain at the amino-terminus (NTD). GenBank accession no. BDF84376 for GR-  
114 A1, BDF84377 for GR-A2, BDF84378 for GR-B1, BDF84379 for GR-B2, BDF84380 for GR-  
115 B3, BDF84381 for GR-C1, BDF84382 for GR-C2, BDF84383 for GR-C3, and BDF84384 for  
116 GR-C4. Sequences were aligned with Clustal W [35], as described in the Methods section.

117

118

119 **2B. Comparison of slender African lungfish GRs and West African lungfish GRs.**

120 To begin to understand sequence conservation and divergence among lungfish GRs, we  
121 compared GR-A1, GR-B1 and GR-C1, which are the three longest slender African lungfish GRs,  
122 with the four West African lungfish glucocorticoid receptor sequences in GenBank (Figure 2).  
123 The multiple sequence alignment, shown in Figure 2, reveals strong sequence conservation in the  
124 DBD, with a difference at only one position containing a semi-conserved phenylalanine-tyrosine.  
125 The sequences in the LBD and hinge domains of slender African lungfish GR and West African  
126 lungfish GR also are highly conserved. There are small segments of sequence divergence in the  
127 NTD, but most of the NTD is conserved. Overall slender African lungfish GRs and African  
128 lungfish GRs are very similar to each other.

|                  |       |  | <b>NTD</b>                                                                            |     |
|------------------|-------|--|---------------------------------------------------------------------------------------|-----|
| Slender lungfish | GR-A1 |  | MLSEARIARKDYAPADMMDPAGSLNSLNGTQSLKYVERSDKTS                                           | 43  |
| Slender lungfish | GR-B1 |  | MSVWHESRHDTDWVCSLKFNRCLHLDYAPADMMDPAGSLNSLNGTQSLKY <b>A</b> ERSDKTS                   | 60  |
| Slender lungfish | GR-C1 |  | MSVWHESRHDTDWVCSLKFNRCLHLDYAPADMMDPAGSLNSLNGTQSLKY <b>A</b> ERSDKTS                   | 60  |
| African lungfish | GR-X1 |  | MSVWHESRHDTDWVCSLKFNRCLHLDYASADMMDPAGSLNNLNGTQSLKYVERSDKTS                            | 60  |
| African lungfish | GR-X2 |  | MLSEARIARKDYASADMMDPAGSLNNLNGTQSLKYVERSDKTS                                           | 43  |
| African lungfish | GR-X3 |  | MQFESLKYASADMMDPAGSLNNLNGTQSLKYVERSDKTS                                               | 40  |
| African lungfish | GR-X4 |  | MMDPAGSLNNLNGTQSLKYVERSDKTS                                                           | 27  |
| *****            |       |  |                                                                                       |     |
| Slender lungfish | GR-A1 |  | SGYPFNPICRGGAGATVTITSPSPRQSAQLDAKQFTCDISNGLGRNDSSRDPSKAVSLS                           | 103 |
| Slender lungfish | GR-B1 |  | SGYPFNPIC <b>GGGAGATVTVSASPSRQASAQLECKQFTCDISNGLGRNASTRDPSKAVSLS</b>                  | 120 |
| Slender lungfish | GR-C1 |  | SGYPFNPIC <b>GGGAGATVTVSASPSRQASAQLECKQFTCDISNGLGRNASTRDPSKAVSLS</b>                  | 120 |
| African lungfish | GR-X1 |  | SGYPFNPIC <b>GGGAGATVTVSASPSRQSAQLECKQFTCDISNGLGRNASTRDPSKAVSLS</b>                   | 120 |
| African lungfish | GR-X2 |  | SGYPFNPIC <b>GGGAGATVTVSASPSRQSAQLECKQFTCDISNGLGRNASTRDPSKAVSLS</b>                   | 103 |
| African lungfish | GR-X3 |  | SGYPFNPIC <b>GGGAGATVTVSASPSRQSAQLECKQFTCDISNGLGRNASTRDPSKAVSLS</b>                   | 100 |
| African lungfish | GR-X4 |  | SGYPFNPIC <b>GGGAGATVTVSASPSRQSAQLECKQFTCDISNGLGRNASTRDPSKAVSLS</b>                   | 87  |
| *****            |       |  |                                                                                       |     |
| Slender lungfish | GR-A1 |  | MGFYMGEVNSKAAGTDFGSO QOQQQSCVSSAENDFLLLEESLANLNRDAGTEASFLSAET                         | 163 |
| Slender lungfish | GR-B1 |  | MGFYMGEVNSKAAGT <b>GFGCQQQEQQSCVSSAENDFLLLEESLANLNRDAETASFLNAET</b>                   | 180 |
| Slender lungfish | GR-C1 |  | MGFYMGEVNSKAAGT <b>GFGCQQQEQQSCVSSAENDFLLLEESLANLNRDAETASFLNAET</b>                   | 180 |
| African lungfish | GR-X1 |  | MGFYMGEVNSKAAGT <b>GFGCQQQEQQSCVSSAENDFLLLEESLANLNRDAETASFLNAET</b>                   | 180 |
| African lungfish | GR-X2 |  | MGFYMGEVNSKAAGT <b>GFGCQQQEQQSCVSSAENDFLLLEESLANLNRDAETASFLNAET</b>                   | 163 |
| African lungfish | GR-X3 |  | MGFYMGEVNSKAAGT <b>GFGCQQQEQQSCVSSAENDFLLLEESLANLNRDAETASFLNAET</b>                   | 160 |
| African lungfish | GR-X4 |  | MGFYMGEVNSKAAGT <b>GFGCQQQEQQSCVSSAENDFLLLEESLANLNRDAETASFLNAET</b>                   | 147 |
| *****            |       |  |                                                                                       |     |
| Slender lungfish | GR-A1 |  | ADSLARGQDFLAMGKTDFFS EQETFSLHGGSDTNGTSRFLSDDQNSFDIFPELSLQTDSP                         | 223 |
| Slender lungfish | GR-B1 |  | <b>TDSLARGQDFSAMGKSDFFPSEQETFSQIGVSDPNGTSRFLSDDQNSFDIFPELSLQTDSP</b>                  | 240 |
| Slender lungfish | GR-C1 |  | <b>TDSLARGQDFSAMGKSDFFPSEQETFSQIGVSDPNGTSRFLSDDQNSFDIFPELSLQTDSP</b>                  | 240 |
| African lungfish | GR-X1 |  | <b>TDSPARGQDFSTMGKSDFFPSEQEAFFSHIGVSDPNGTSRFLSDDQNSFDIFPELNLQTDSP</b>                 | 240 |
| African lungfish | GR-X2 |  | <b>TDSPARGQDFSTMGKSDFFPSEQEAFFSHIGVSDPNGTSRFLSDDQNSFDIFPELNLQTDSP</b>                 | 223 |
| African lungfish | GR-X3 |  | <b>TDSPARGQDFSTMGKSDFFPSEQEAFFSHIGVSDPNGTSRFLSDDQNSFDIFPELNLQTDSP</b>                 | 220 |
| African lungfish | GR-X4 |  | <b>TDSPARGQDFSTMGKSDFFPSEQEAFFSHIGVSDPNGTSRFLSDDQNSFDIFPELNLQTDSP</b>                 | 207 |
| *****            |       |  |                                                                                       |     |
| Slender lungfish | GR-A1 |  | GRITDGPWNLETFCDDEDD GGAGLSPLLDNAISEPGGLNEECRGLVGNMFMFVKNNEC                           | 283 |
| Slender lungfish | GR-B1 |  | GRITDGPWNLETFCDDEDD <b>-GAGLSPLPIDNAISEAGGLSEECRGLVGNMNFVKNNDC</b>                    | 299 |
| Slender lungfish | GR-C1 |  | GRITDGPWNLETFCDDEDD <b>-GAGLSPLPIDNAISEAGGLSEECRGLVGNMNFVKNNDC</b>                    | 299 |
| African lungfish | GR-X1 |  | GRIT <b>GGS</b> PWNLETFCDDEDD <b>EGVGLSPLQIDNAISEAGGLSEACRGLVGNMNFVKNI</b> EC         | 300 |
| African lungfish | GR-X2 |  | GRIT <b>GGS</b> PWNLETFCDDEDD <b>EGVGLSPLQIDNAISEAGGLSEACRGLVGNMNFVKNI</b> EC         | 283 |
| African lungfish | GR-X3 |  | GRIT <b>GGS</b> PWNLETFCDDEDD <b>EGVGLSPLQIDNAISEAGGLSEACRGLVGNMNFVKNI</b> EC         | 280 |
| African lungfish | GR-X4 |  | GRIT <b>GGS</b> PWNLETFCDDEDD <b>EGVGLSPLQIDNAISEAGGLSEACRGLVGNMNFVKNI</b> EC         | 267 |
| *****            |       |  |                                                                                       |     |
| Slender lungfish | GR-A1 |  | HDSQMPSTSAELPQVKREKE SYIELVTPGVIKQEQLSRGFCQASSSEFDAPAPISIHGVS                         | 343 |
| Slender lungfish | GR-B1 |  | <b>HVSQMPSTSAELPQVKREKESYIELVTPGVIKQEQLNRGFCQASSSEFDA</b> TATISIHGVS                  | 359 |
| Slender lungfish | GR-C1 |  | <b>HVSQMPSTSAELPQVKREKESYIELVTPGVIKQEQLNRGFCQASSSEFDA</b> TATISIHGVS                  | 359 |
| African lungfish | GR-X1 |  | <b>QDSQMPSTSAELPQVKREKEYIELVTPGVIKQEQLNRGFCQASSSEFD</b> TPATISVHGVS                   | 360 |
| African lungfish | GR-X2 |  | <b>QDSQMPSTSAELPQVKREKEYIELVTPGVIKQEQLNRGFCQASSSEFD</b> TPATISVHGVS                   | 343 |
| African lungfish | GR-X3 |  | <b>QDSQMPSTSAELPQVKREKEYIELVTPGVIKQEQLNRGFCQASSSEFD</b> TPATISVHGVS                   | 340 |
| African lungfish | GR-X4 |  | <b>QDSQMPSTSAELPQVKREKEYIELVTPGVIKQEQLNRGFCQASSSEFD</b> TPATISVHGVS                   | 327 |
| *****            |       |  |                                                                                       |     |
| Slender lungfish | GR-A1 |  | TSGGQSYCYGVNSSPRSOHQ DQKPVFTFIPPFITAIGNNRSRCQGSSSNPLSPLTTGSYA                         | 403 |
| Slender lungfish | GR-B1 |  | TSGGQSYCYGV <b>DSSPCSQKQDKQPVFTFIPPF</b> TIGNNRSRCLGSS <b>DSS</b> LSPLT <b>AGSY</b> T | 419 |
| Slender lungfish | GR-C1 |  | TSGGQSYCYGV <b>DSSPCSQKQDKQPVFTFIPPF</b> TIGNNRSRCLGSS <b>DSS</b> LSPLT <b>AGSY</b> T | 419 |
| African lungfish | GR-X1 |  | TSGGQSYCYGV <b>DSSPCSQKQDKQPVFTFIPPF</b> TIGNNRSRCLGSS <b>DSS</b> LSPLT <b>AGSY</b> T | 420 |
| African lungfish | GR-X2 |  | TSGGQSYCYGV <b>DSSPCSQKQDKQPVFTFIPPF</b> TIGNNRSRCLGSS <b>DSS</b> LSPLT <b>AGSY</b> T | 403 |
| African lungfish | GR-X3 |  | TSGGQSYCYGV <b>DSSPCSQKQDKQPVFTFIPPF</b> TIGNNRSRCLGSS <b>DSS</b> LSPLT <b>AGSY</b> T | 400 |
| African lungfish | GR-X4 |  | TSGGQSYCYGV <b>DSSPCSQKQDKQPVFTFIPPF</b> TIGNNRSRCLGSS <b>DSS</b> LSPLT <b>AGSY</b> T | 387 |
| *****            |       |  |                                                                                       |     |
| Slender lungfish | GR-A1 |  | GVSGFISSTGTALKINSSPPSGTSSSPGPPAKV                                                     | 438 |
| Slender lungfish | GR-B1 |  | GVSGFISSTGT <b>VKTNSNSPPSGTSSSPGPPAKV</b>                                             | 454 |
| Slender lungfish | GR-C1 |  | GVSGFISSTGT <b>VKTNSNSPPSGTSSSPGPPAKV</b>                                             | 454 |
| African lungfish | GR-X1 |  | <b>G</b> LSGFISSTGT <b>MKINSNSPPSGTSSSPGPPAKV</b>                                     | 455 |
| African lungfish | GR-X2 |  | <b>G</b> LSGFISSTGT <b>MKINSNSPPSGTSSSPGPPAKV</b>                                     | 438 |
| African lungfish | GR-X3 |  | <b>G</b> LSGFISSTGT <b>MKINSNSPPSGTSSSPGPPAKV</b>                                     | 435 |
| African lungfish | GR-X4 |  | <b>G</b> LSGFISSTGT <b>MKINSNSPPSGTSSSPGPPAKV</b>                                     | 422 |
| *****            |       |  |                                                                                       |     |

129

130

**FIGURE 2A**



|                  |       |     |                    | DBD                                              |                       |
|------------------|-------|-----|--------------------|--------------------------------------------------|-----------------------|
| Slender lungfish | GR-A1 | 439 | CLVCSDEASGCHYGVLTC | GSCKVFVKRAVEGOHNYLCAGRND                         | CIIDKIRRKNCPCACRYRK   |
| Slender lungfish | GR-B1 | 455 | CLVCSDEASGCHYGVLTC | GSCKVFVKRAVEGOHNYLCAGRND                         | CIIDKIRRKNCPCACR FRK  |
| Slender lungfish | GR-C1 | 455 | CLVCSDEASGCHYGVLTC | GSCKVFVKRAVEGOHNYLCAGRND                         | CIIDKIRRKNCPCACR FRK  |
| African lungfish | GR-X1 | 456 | CLVCSDEASGCHYGVLTC | GSCKVFVKRAVEGOHNYLCAGRND                         | CIIDKIRRKNCPCACR FRK  |
| African lungfish | GR-X2 | 439 | CLVCSDEASGCHYGVLTC | GSCKVFVKRAVEGOHNYLCAGRND                         | CIIDKIRRKNCPCACR FRK  |
| African lungfish | GR-X3 | 436 | CLVCSDEASGCHYGVLTC | GSCKVFVKRAVEGOHNYLCAGRND                         | CIIDKIRRKNCPCACR FRK  |
| African lungfish | GR-X4 | 423 | CLVCSDEASGCHYGVLTC | GSCKVFVKRAVEGOHNYLCAGRND                         | CIIDKIRRKNCPCACR FRK  |
| *****            |       |     |                    |                                                  |                       |
|                  |       |     |                    | hinge                                            |                       |
| Slender lungfish | GR-A1 | 499 | CLOAGMNLDAKSKKKMK  | GIQOPNEPSVANPASESTANKALPTSL                      | POLTPTTIINLLEVI       |
| Slender lungfish | GR-B1 | 515 | CLOAGMNLDAKSKKKMK  | GIQOPNEPLVAKPASESTTNKALLPTSL                     | POLTPTTIINLLEVI       |
| Slender lungfish | GR-C1 | 515 | CLOAGMNLDAKSKKKMK  | GIQOPNEPLVAKPASESTTNKALLPTSL                     | POLTPTTIINLLEVI       |
| African lungfish | GR-X1 | 516 | CLOAGMNLDAKSKKKMK  | GIQOPNEQSVAKPASESTTNKALLPTSL                     | POLTPTTIINLLEVI       |
| African lungfish | GR-X2 | 499 | CLOAGMNLDAKSKKKMK  | GIQOPNEQSVAKPASESTTNKALLPTSL                     | POLTPTTIINLLEVI       |
| African lungfish | GR-X3 | 496 | CLOAGMNLDAKSKKKMK  | GIQOPNEQSVAKPASESTTNKALLPTSL                     | POLTPTTIINLLEVI       |
| African lungfish | GR-X4 | 483 | CLOAGMNLDAKSKKKMK  | GIQOPNEQSVAKPASESTTNKALLPTSL                     | POLTPTTIINLLEVI       |
| *****            |       |     |                    |                                                  |                       |
|                  |       |     |                    | LBD                                              |                       |
| Slender lungfish | GR-A1 | 559 | EPDVIYAGYDSTSPDTS  | RLMSAMNTLGGQVVAAVKWA                             | SLPGFRNPLDDQMSLIQYS   |
| Slender lungfish | GR-B1 | 575 | EPDVIYAGYDSTSPDTS  | SSRLMSAMNTLGGQVVAAVKWA                           | SLPGFRNLPPLDDQMSLIQYS |
| Slender lungfish | GR-C1 | 575 | EPDVIYAGYDSTSPDTS  | SSRLMSAMNTLGGQVVAAVKWA                           | SLPGFRNLPPLDDQMSLIQYS |
| African lungfish | GR-X1 | 576 | EPDVIYAGYDSTSPD    | SSRLMSAMNTLGGQVVAAVKWA                           | TLPGFRNLPPLDDQMSLIQYS |
| African lungfish | GR-X2 | 559 | EPDVIYAGYDSTSPD    | SSRLMSAMNTLGGQVVAAVKWA                           | TLPGFRNLPPLDDQMSLIQYS |
| African lungfish | GR-X3 | 556 | EPDVIYAGYDSTSPD    | SSRLMSAMNTLGGQVVAAVKWA                           | TLPGFRNLPPLDDQMSLIQYS |
| African lungfish | GR-X4 | 543 | EPDVIYAGYDSTSPD    | SSRLMSAMNTLGGQVVAAVKWA                           | TLPGFRNLPPLDDQMSLIQYS |
| *****            |       |     |                    |                                                  |                       |
| Slender lungfish | GR-A1 | 613 | WMFLMTFGLGWRSYKQSS | GTMLCYAPDLVITEERMRLPYMMEHCHHLI                   | RIAQAFAQLQIT          |
| Slender lungfish | GR-B1 | 635 | WMFLMTFGLGWRSYKQSS | GTMLCYAPDLVITEERMRLPYMMEHCHHLI                   | KIAQAFAQLLEIT         |
| Slender lungfish | GR-C1 | 635 | WMFLMTFGLGWRSYKQSS | GTMLCYAPDLVITEERMRLPYMMEHCHHLI                   | KIAQAFAQLLEIT         |
| African lungfish | GR-X1 | 636 | WMFLMTFGLGWRSYKQS  | NGAMLCYAPDLVITDERMQLPYMMEHCHYLI                  | KIAQAFAQLQIT          |
| African lungfish | GR-X2 | 619 | WMFLMTFGLGWRSYKQS  | NGAMLCYAPDLVITDERMQLPYMMEHCHYLI                  | KIAQAFAQLQIT          |
| African lungfish | GR-X3 | 616 | WMFLMTFGLGWRSYKQS  | NGAMLCYAPDLVITDERMQLPYMMEHCHYLI                  | KIAQAFAQLQIT          |
| African lungfish | GR-X4 | 603 | WMFLMTFGLGWRSYKQS  | NGAMLCYAPDLVITDERMQLPYMMEHCHYLI                  | KIAQAFAQLQIT          |
| *****            |       |     |                    |                                                  |                       |
| Slender lungfish | GR-A1 | 679 | FEEYLCMKALLLLSTIPK | EGLKKSQAVFEEIRMTYIKELGKAI                        | VOKERSSTONWQRFQLT     |
| Slender lungfish | GR-B1 | 695 | FEEYLCMKALLLLST    | VPKEGLKSQAVFEEIRMTYIKELGKAI                      | VOKERSSTONWQRFQLT     |
| Slender lungfish | GR-C1 | 695 | FEEYLCMKALLLLST    | VPKEGLKSQAVFEEIRMTYIKELGKAI                      | VOKERSSTONWQRFQLT     |
| African lungfish | GR-X1 | 696 | FEEYLCMKALLLLST    | VPKEGLKSQAVFEEIRMTYIKELGKAI                      | VOKERSSTONWQRFQLT     |
| African lungfish | GR-X2 | 679 | FEEYLCMKALLLLST    | VPKEGLKSQAVFEEIRMTYIKELGKAI                      | VOKERSSTONWQRFQLT     |
| African lungfish | GR-X3 | 676 | FEEYLCMKALLLLST    | VPKEGLKSQAVFEEIRMTYIKELGKAI                      | VOKERSSTONWQRFQLT     |
| African lungfish | GR-X4 | 663 | FEEYLCMKALLLLST    | VPKEGLKSQAVFEEIRMTYIKELGKAI                      | VOKERSSTONWQRFQLT     |
| *****            |       |     |                    |                                                  |                       |
| Slender lungfish | GR-A1 | 739 | KLLDSMHDVVAKVLNVCF | QNFLDRSRCVEYPDMLQELITNQLPRIRSGNVKPLLFHQK         | 796                   |
| Slender lungfish | GR-B1 | 755 | KLLDSMHDVV         | SKVLNVCFQNFLDRSRCVEYPDMLQELITNQLPRIRSGNVKPLLFHQK | 812                   |
| Slender lungfish | GR-C1 | 755 | KLLDSMHDVV         | TKVLNVCFQNFLDRSRCVEYPDMLQELITNQLPRIRSGNVKPLLFHQK | 812                   |
| African lungfish | GR-X1 | 756 | KLLDSMHDVV         | TKVLNVCFQNFLDRSRCVDYPEMLQELITNQLPRIRSGNV         | RPLLFHQK 813          |
| African lungfish | GR-X2 | 739 | KLLDSMHDVV         | TKVLNVCFQNFLDRSRCVDYPEMLQELITNQLPRIRSGNV         | RPLLFHQK 796          |
| African lungfish | GR-X3 | 736 | KLLDSMHDVV         | TKVLNVCFQNFLDRSRCVDYPEMLQELITNQLPRIRSGNV         | RPLLFHQK 793          |
| African lungfish | GR-X4 | 723 | KLLDSMHDVV         | TKVLNVCFQNFLDRSRCVDYPEMLQELITNQLPRIRSGNV         | RPLLFHQK 780          |
| *****            |       |     |                    |                                                  |                       |

Figure 2B

Figure 2. Multiple Alignment of the amino acid sequences of three African lungfish GRs and four West African lungfish GRs.

West African lungfish glucocorticoid receptor sequences were downloaded from GenBank (Accessions XP\_043925084 for X1, XP\_043925085 for X2, XP\_043925087 for X3, XP\_043925088 for X4). Sequences were aligned with Clustal W [35], as described in the Methods section.

## 2C. Comparison of the amino acid sequences of slender African lungfish GR, West African lungfish GR, coelacanth GR, zebrafish GR and human GR.

To begin to understand the relationship of lungfish GRs to other selected GRs, we constructed a multiple sequence alignment of slender African lungfish GR with West African

145 lungfish GR, coelacanth GR, zebrafish GR and human GR (Figure 3). The DBD and hinge  
146 domains are highly conserved in all GRs. There is good sequence conservation of the LBD in all  
147 six GRs. However, there is an interesting pattern of sequence conservation in the NTD. There is  
148 excellent sequence conservation in the NTD among slender African lungfish GR, West African  
149 lungfish GR, coelacanth GR and human GR. The stronger conservation of the NTD in lungfish  
150 GRs with human GR than with zebrafish GR, indicates that the NTD in zebrafish GR has  
151 diverged from the other GRs.  
152

|                     |            |        |         |        |         |        |           |          |         |          |
|---------------------|------------|--------|---------|--------|---------|--------|-----------|----------|---------|----------|
| Slender lungfish GR | MSVWHESRHD | TWDVCS | PKFNRC  | GLHLDY | APADM   | PAGS   | LNSLNGTQ  | SLKYAERS | SDKTS   | 60       |
| African lungfish GR | MSVWHESRHD | TWDVCS | PKFNRC  | GLHLDY | ASADM   | PAGS   | LNNLNGTQ  | SLKYVERS | SDKTS   | 60       |
| Coelacanth GR       |            |        |         |        |         |        | MMESKEV   | LNTSGGD- | SLKVD-  | YSKRE    |
| Human GR            |            |        |         |        |         |        | MDSKES    | LTPGEE-  | NPSSVL- | AQERG    |
| Zebrafish GR        |            |        |         |        |         |        | MDQGLENGK | -----    | KRDERL  | 16       |
| Slender lungfish GR | SGYP       | FNPI   | CGGAGA  | ---    | TVTVSAS | PSRQ-  | ASAQLECK  | QFTCDI   | SNGLGR  | NASTRDP  |
| African lungfish GR | SGYP       | FNPI   | CGGAGA  | ---    | TVTVSAS | PSRQ-  | TSAQLECK  | QFTCDI   | SNGLGR  | NATTRDP  |
| Coelacanth GR       | EVYD       | FNPF   | RGCAPI  | ---    | PLTPASS | LLLV-  | SEADSPROL | ASGDT    | SNVSG   | NATPODLS |
| Human GR            | DVMD       | FYKTL  | RGCAPI  | ---    | KVSASSP | LAVASQ | SDSKORRL  | LVDFPK   | GSVS    | NAQQPDL  |
| Zebrafish GR        | NTLD       | YNKR   | ATEG    | IL     | PRRIQ   | STMSV  | APTSMV    | PQAGP    | PMQPV   | SGDIPNGL |
| Slender lungfish GR | VSL        | SMGF   | YMGE    | VNSK   | AAGT    | GFGC   | QQQE      | QSCVSS   | SAEND   | FFLLES   |
| African lungfish GR | VSL        | SMGF   | YMGE    | VNSK   | AAGT    | GFGC   | QQQE      | QSCVSS   | SAEND   | FFLLES   |
| Coelacanth GR       | VSE        | SMGL   | YMGE    | SDSK   | VIGOK   | ARLQ   | QKQIS     | -GLSV    | TEFAL   | LESIAS   |
| Human GR            | VSL        | SMGL   | YMGE    | TETK   | VMGND   | LGFP   | QQQIS     | -LSSGE   | TDLKL   | LESIAS   |
| Zebrafish GR        | VSL        | --SIF  | GDDSEL  | LLGK   | EQRAL   | QQQTLV | -PFTL     | GDSL     | SGL     | EASLAD   |
| Slender lungfish GR | LNAETD     | SLARG  | QDFS    | AMKSD  | FPS     | EQ     | ETFSQ     | IGVSD    | PNGT    | SRLFS    |
| African lungfish GR | LNAETD     | SPARG  | QDFS    | TMKSD  | FPS     | EQ     | EAFSH     | IGVSD    | PNGT    | SRLFS    |
| Coelacanth GR       | SLAPQV     | SL--   | DNGS    | GMKAC  | DL      | SV     | EQ        | ETFAQ    | T-DSD   | PNGLS    |
| Human GR            | SSASTAV    | SAAPTE | KEKFP   | KTHSD  | VSS     | EQ     | QHLKG     | Q-TGT    | NGN     | VKLYTT   |
| Zebrafish GR        | GGVD       | PNL    | FLPK    | TEDF   | SPM     | IKGD   | MDL       | QDS      | FGH     | GKDV     |
| Slender lungfish GR | QTD        | SPGR   | ITDGS   | PWNLET | FC      | DD     | EDGAG     | LSP      | LP-     | IDNAISE  |
| African lungfish GR | QTD        | SPGR   | ITDGS   | PWNLET | FC      | DD     | EDGAG     | LSP      | LP-     | IDNAISE  |
| Coelacanth GR       | TPC        | SPGKE  | --      | NPWS   | LDPI    | YD     | GGGR--    | GLLS     | P       | LA-ADD   |
| Human GR            | SSG        | SPGKET | NES     | PWR    | SDLL    | IE-    | -N--      | CLLS     | P       | LAGE     |
| Zebrafish GR        | DGSP       | SPDFY  | VAD---- | DAFL   | STIG-   | EDALL  | SEL       | ETN----- | LDR     | SKAAV--  |
| Slender lungfish GR | VKNND      | CHVS   | QMPST   | SAELP  | QV      | KRE    | KEYI      | IEL      | VTP     | PGVI     |
| African lungfish GR | VKNI       | ECQD   | SQMPST  | SAELP  | QV      | KRE    | KEYI      | IEL      | VTP     | PGVI     |
| Coelacanth GR       | STNNE      | CGN    | LFT     | PDL    | SSQLS   | QIK    | SDKE      | GYI      | IEL     | TPGV     |
| Human GR            | KIKD       | NDL    | VLSS    | SPSN   | VTL     | QV     | TEK       | EDFI     | IEL     | CTPG     |
| Zebrafish GR        | TLNG       | TASS   | SL      | STANT  | SII     | ENIK   | VEK       | DSII     | IQ      | CTPG     |
| Slender lungfish GR | TAT        | SIH    | GV      | TS     | GGQ     | S      | YCYG      | VDS--    | SPCS    | QK       |
| African lungfish GR | PATI       | SVH    | GV      | TS     | GGQ     | S      | YCYG      | VDS--    | SPCS    | QH       |
| Coelacanth GR       | NSSI       | SIH    | GV      | TS     | GGQ     | MYH    | VDN       | AGAV     | SSA     | QQ       |
| Human GR            | MSAI       | SVH    | GV      | TS     | GGQ     | MYH    | DMN--     | --       | TASL    | QQ       |
| Zebrafish GR        | --         | TPIN   | IC      | GV     | TS      | GGQ    | S         | YCYG     | VDS--   | SPCS     |
| Slender lungfish GR | SSLSP      | L      | TAGSY   | T      | GVSG    | L      | SSST      | G        | TAVK    | TNSNP-   |
| African lungfish GR | SSLSP      | L      | TAGSY   | T      | GVSG    | L      | SSST      | G        | TAVK    | TNSNP-   |
| Coelacanth GR       | NSTPP      | L      | GNV     | NAS    | G       | RSG    | F         | ASSY     | SPG     | TRTAT    |
| Human GR            | NL-TS      | L      | GT      | LNF    | P       | GRTV   | PS        | NGY      | SSP     | MRP      |
| Zebrafish GR        | SGM        | Q      | RAS     | L      | C       | F      | S         | KN--     | FS---   | SS       |
| Slender lungfish GR | YGV        | L      | TCG     | S      | CKV     | V      | FK        | R        | A       | V        |
| African lungfish GR | YGV        | L      | TCG     | S      | CKV     | V      | FK        | R        | A       | V        |
| Coelacanth GR       | YGV        | L      | TCG     | S      | CKV     | V      | FK        | R        | A       | V        |
| Human GR            | YGV        | L      | TCG     | S      | CKV     | V      | FK        | R        | A       | V        |
| Zebrafish GR        | YGV        | L      | TCG     | S      | CKV     | V      | FK        | R        | A       | V        |
| Slender lungfish GR | SK         | K      | K       | M      | G       | I      | Q         | P        | N       | E        |
| African lungfish GR | SK         | K      | K       | M      | G       | I      | Q         | P        | N       | E        |
| Coelacanth GR       | SK         | K      | L       | N      | K       | M      | G         | N        | -       | L        |
| Human GR            | TK         | K      | K       | I      | G       | I      | Q         | A        | T       | ---      |
| Zebrafish GR        | SK         | K      | A       | R      | Q       | A      | G         | V        | I       | Q        |
| Slender lungfish GR | ST         | S      | P       | D      | T       | S      | S         | R        | L       | S        |
| African lungfish GR | ST         | S      | P       | D      | T       | S      | S         | R        | L       | S        |
| Coelacanth GR       | ST         | I      | P       | D      | T       | H      | C         | R        | L       | M        |
| Human GR            | SSV        | P      | D       | S      | T       | W      | R         | I        | M       | T        |
| Zebrafish GR        | ST         | I      | P       | D      | T       | S      | V         | R        | L       | M        |
| Slender lungfish GR | WRSYK      | Q      | S       | S      | G       | T      | V         | L        | C       | Y        |
| African lungfish GR | WRSYK      | Q      | S       | S      | G       | T      | V         | L        | C       | Y        |
| Coelacanth GR       | WRSYQ      | Q      | S       | S      | G       | T      | V         | L        | C       | Y        |
| Human GR            | WRSYR      | Q      | S       | S      | A       | N      | L         | C        | F       | A        |
| Zebrafish GR        | WRSYQ      | H      | C       | N      | G       | N      | M         | L        | C       | F        |
| Slender lungfish GR | LLL        | STV    | P       | K      | E       | G      | L         | K        | S       | O        |
| African lungfish GR | LLL        | STV    | P       | K      | E       | G      | L         | K        | S       | O        |
| Coelacanth GR       | LLL        | STI    | P       | O      | E       | G      | L         | K        | S       | O        |
| Human GR            | LLL        | SSV    | P       | K      | D       | G      | L         | K        | S       | O        |
| Zebrafish GR        | LLL        | N      | T       | V      | P       | K      | D         | G        | L       | K        |
| Slender lungfish GR | TKV        | L      | N       | V      | C       | F      | O         | N        | E       | L        |
| African lungfish GR | TKV        | L      | N       | V      | C       | F      | O         | N        | E       | L        |
| Coelacanth GR       | KELL       | K      | I       | C      | F       | H      | T         | F        | V       | D        |
| Human GR            | ENL        | N      | Y       | C      | F       | O      | T         | F        | L       | D        |
| Zebrafish GR        | GGL        | L      | N       | F      | C       | F      | Y         | T        | F       | V        |

153

154

155 **Figure 3. Multiple Sequence Alignment of slender African lungfish GR, West African**  
 156 **lungfish GR, coelacanth GR, zebrafish GR and human GR.**

157 Glucocorticoid receptor sequences were downloaded from GenBank (Accession no.  
 158 NP\_000167 for human GR, XP\_005996162 for coelacanth GR, and NP\_001018547 for  
 159 zebrafish GR) and aligned with Clustal W [35], as described in the Methods section. The NTD  
 160 in zebrafish GR has gaps and sequence differences with the other GRs.

162 **2D. Comparison of functional domains in slender African lungfish GR with domains in**  
 163 **West African lungfish GR, coelacanth GR, zebrafish GR and human GR.**

164 Figure 4 shows the percent identity in the comparison of the different functional domains  
 165 on slender African lungfish GR with the GR and MR from other vertebrates.

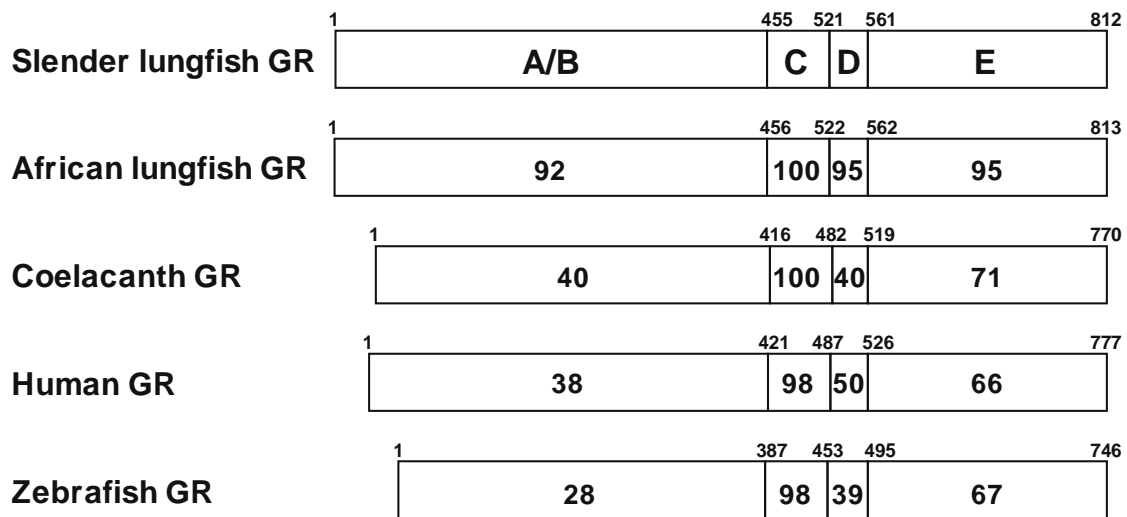

169  
 170  
 171 **Figure 4. Comparison of functional domains of slender lungfish GR with domains in West**  
 172 **African lungfish GR, coelacanth GR, zebrafish GR, human GR.**

173 Comparison of domains in slender African lungfish GR with GRs from West African lungfish,  
 174 coelacanths, humans and zebrafish and MRs from slender African lungfish, West African  
 175 lungfish, humans and zebrafish. The functional NTD (A/B), DBD (C), hinge (D) and LBD (E)

176 domains are schematically represented with the numbers of amino acid residues and the  
177 percentage of amino acid identity depicted.

178

179 As shown in figure 4, the DBD and LBD are highly conserved in all GRs. For example,  
180 slender African lungfish GR and human GR have 98% and 66% identity in DBD and LBD,  
181 respectively. There are similar % identities between corresponding DBDs and LBDs in lungfish  
182 GR and other GRs. This strong conservation of the DBD and LBD contrasts with the lower  
183 sequence identity between the NTD of slender African lungfish GR and human GR (38%) and  
184 even lower sequence identity with the NTD in zebrafish GR (28%).

185

## 186 **2E. Phylogenetic Analysis.**

187 To better understand the relationships among the nine *P. dolloi* GRs and four *P.*  
188 *annectens* GRs, we constructed the phylogenetic tree, shown in Figures 5. In this phylogeny, the  
189 four African lungfish GRs cluster into one group. Slender African lungfish GR-A1 and GR-A2  
190 are in a separate branch from the other slender African lungfish GRs. GR-A2 appears to be  
191 formed by alternative splicing of GR-A1. GR-B1, GR-B2 and GR-B3 cluster. GR-C3 and GR-  
192 C4 cluster, and GR-C4 appears to be formed by alternative splicing of GR-C3.

193

194

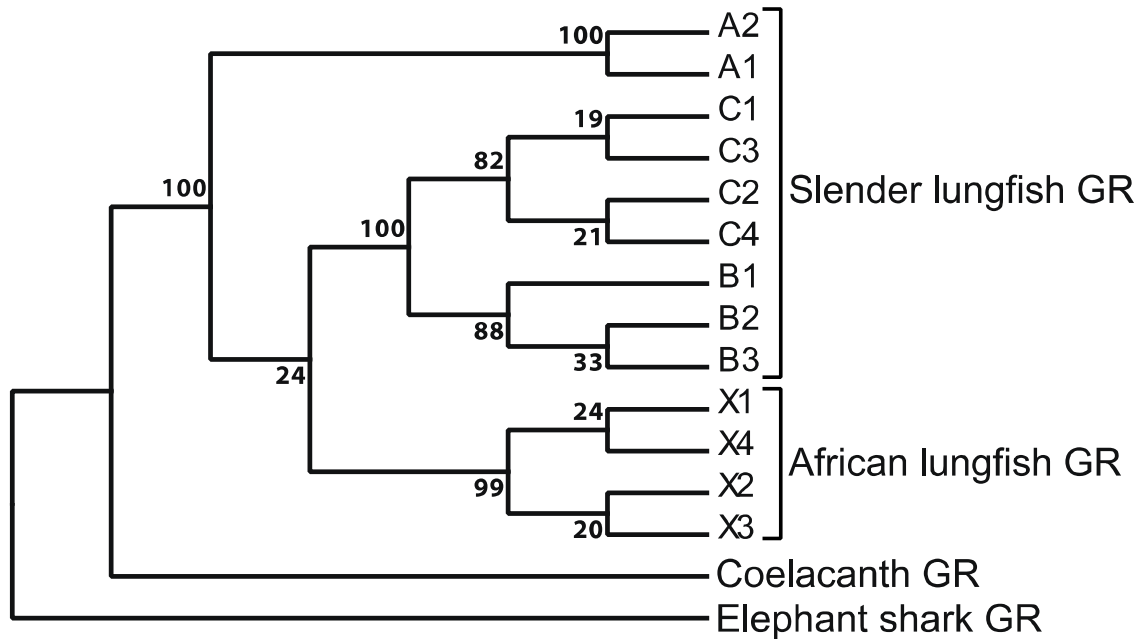

195

196

197 **Figure 5. Phylogeny of slender African lungfish Glucocorticoid Receptors, West African**  
198 **lungfish Glucocorticoid Receptors, Coelacanth GR and Elephant Shark GR.** MEGA5 [36]  
199 was used to construct this phylogeny. Statistics are based on 1,000 runs.

200

## 201 **2F. Basis for the failure to clone *P. dolloi* GR.**

202 Figure 6 shows the location of the PCR primers that we used to successfully clone GRs  
203 from chicken, alligator and frog [31]. Due to the strong conservation of the GR and MR these  
204 PCR primers retrieved partial sequences from both the GR and MR in chicken, alligator and  
205 frog. The full sequences of these GRs and MRs was achieved in the next step using RACE. Our  
206 failure to clone *P. dolloi* GR was due using WQRFYQ instead of WQRFFQ for the 1<sup>st</sup>/2<sup>nd</sup>-  
207 reverse primer. When we used WQRFFQ we were able to clone *P. dolloi* GR.



| 1st-forward primer site |     |        |     | 2nd-forward primer site |     |        |     |
|-------------------------|-----|--------|-----|-------------------------|-----|--------|-----|
| human GR                | 430 | GCHYGV | 435 | human GR                | 441 | CKVFFK | 446 |
| chicken GR              | 425 | GCHYGV | 430 | chicken GR              | 436 | CKVFFK | 441 |
| Xenopus GR              | 429 | GCHYGV | 434 | Xenopus GR              | 440 | CKVFFK | 445 |
| zebrafish GR            | 396 | GCHYGV | 401 | zebrafish GR            | 407 | CKVFFK | 412 |
| coelacanth GR           | 425 | GCHYGV | 430 | coelacanth GR           | 436 | CKVFFK | 441 |
| P.a lungfish GR         | 465 | GCHYGV | 470 | P.a lungfish GR         | 476 | CKVFFK | 481 |
| P.d lungfish GR         | 464 | GCHYGV | 469 | P.d lungfish GR         | 475 | CKVFFK | 480 |

  

| 1st/2nd-reverse primer site |     |                 |     |
|-----------------------------|-----|-----------------|-----|
| human GR                    | 712 | WQRFYQ          | 717 |
| chicken GR                  | 707 | WQRFYQ          | 712 |
| Xenopus GR                  | 711 | WQRFYQ          | 716 |
| zebrafish GR                | 681 | WQRFYQ          | 686 |
| coelacanth GR               | 705 | WQRFYQ          | 710 |
| P.a lungfish GR             | 748 | WQRF <u>F</u> Q | 753 |
| P.d lungfish GR             | 747 | WQRF <u>F</u> Q | 752 |

208  
209 P.a. = *Protopterus annectens*, P. d. = *Protopterus dolloi*

210

211 **Figure 6. Location of PCR primers used for cloning of slender African lungfish GR,**  
212 **coelacanth GR, elephant shark GR, zebrafish GR and human GR.**

213 The correct 1<sup>st</sup>/2<sup>nd</sup>-reverse primer for PCR cloning of *P. dolloi* GR is WQRFFQ instead  
214 of WQRFYQ.

215

## 216 **2G. Summary**

217 *P. dolloi* contains nine GR isoforms, in contrast to *P. annectens*, which contains four GR  
218 isoforms. We do not know how many GR isoforms are in Australian lungfish (*Neoceratodus*  
219 *forsteri*) because their GR sequences have not been deposited in GenBank. The availability of  
220 sequences of *P. dolloi* GRs and *P. annectens* GRs should permit using PCR to clone *N. forsteri*  
221 GRs, which would elucidate the number GR isoforms in this lungfish and the relationship of  
222 their GRs to the GRs of *P. dolloi* and *P. annectens*.

223 The response to corticosteroids of any lungfish GR is not known, nor are the functions of  
224 the multiple GR isoforms in *P. dolloi* GRs and *P. annectens* GRs. We have initiated studies to  
225 determine corticosteroid activation of *P. dolloi* GRs to begin to elucidate the functions of slender  
226 African lungfish GRs. It is interesting that there are multiple isoforms of human GR, due to  
227 alternative splicing of human GR, and these isoforms are important in achieving functional  
228 diversity of human GR [6,8,34,37]. A similar scenario is likely for *P. dolloi* GRs and *P.*  
229 *annectens* GRs.

230

### 231 **3. Methods**

#### 232 **3A. Animal**

233 A slender spotted African lungfish, *Protopterus dolloi*, was purchased from a local  
234 commercial supplier. Lungfish were anesthetized in freshwater containing 0.02% ethyl 3-  
235 aminobenzoate methane-sulfonate from Sigma-Aldrich, and tissue samples were quickly  
236 dissected and frozen in liquid nitrogen. Animal handling procedures conformed to the guidelines  
237 set forth by the Institutional Animal Care and Use Committee at the University of Tokyo.

238

#### 239 **3B. Molecular cloning of lungfish *P. dolloi* glucocorticoid receptor.**

240 For *P. dolloi* GR cloning, we designed 4 types of forward N-terminal primers:

241 F-X1: 5'-GTCATTTTCCCCGTGCTTAACGAA-3',

242 F-X2: 5'-GTCTGCAGCTTGAAACTTTGTAAC-3',

243 F-X3: 5'-GACGAACATGCTGACCGGATCATAA-3', and

244 F-X4: 5'-CATACTGCATTTACCAGAATAGAC-3'

245 and one C-terminal Reverse primer: R: 5'-GTTAAGGCAAATTTCTGATATTAAGGCAG-3'

246 based on the sequences of *P. annectens* GR (X1: XM\_044069149, X2: XM\_044069150, X3:

247 XM\_044069152, X4: XM\_044069153). PCR was performed using four primer sets (F-X1xR, F-

248 X2xR, F-X3xR, and F-X4xR) with ovary cDNA of *P. dolloi*, and the amplified DNA fragments

249 with KOD-plus- DNA polymerase were subcloned into a cloning vector, pCR-BluntII-TOPO,

250 and sequence analysis was performed for 10 or more clones for each primer sets.

251

#### 252 **3C. Database and sequence analysis.**

253 GRs for phylogenetic analysis were collected with Blast searches of Genbank. A phylogenetic  
254 tree for GRs was constructed by Maximum Likelihood analysis based on the JTT + G model  
255 after sequences were aligned by Clustal W [35]. . Statistical confidence for each branch in the  
256 tree was evaluated by the bootstrap methods [38] with 1000 replications. Evolutionary analyses  
257 were conducted in MEGA5 program [36].

258

#### 259 **4. AUTHOR CONTRIBUTIONS**

260 Y.K., S.O., L.B. and M.E.B. carried out the research and analyzed data. S.H. aided in the  
261 collection of animals. X.L. constructed plasmid DNAs used in this study. Y.K. and M.E.B.  
262 conceived and designed the experiments. Y.K., L.B. and M.E.B. wrote the paper. All authors  
263 gave final approval for publication.

264

#### 265 **5. FUNDING**

266 Y.K. was supported in part by Grants-in-Aid for Scientific Research [19K067309] from the  
267 Ministry of Education, Culture, Sports, Science and Technology of Japan, and Takeda Science  
268 Foundation. L.B. was supported by the INSERM (Institut National de la Santé et de la  
269 Recherche Médicale). M.E.B. was supported by UC San Diego Research fund #3096.

270

#### 271 **6. REFERENCES**

- 272 1. Baker ME, Nelson DR, Studer RA. Origin of the response to adrenal and sex steroids:  
273 Roles of promiscuity and co-evolution of enzymes and steroid receptors. *J Steroid Biochem*  
274 *Mol Biol.* 2015;151:12-24. doi:10.1016/j.jsbmb.2014.10.020.
- 275 2. Evans RM. The steroid and thyroid hormone receptor superfamily. *Science.*  
276 1988;240(4854):889-895. doi:10.1126/science.3283939.
- 277 3. Bridgham JT, Eick GN, Larroux C, et al. Protein evolution by molecular tinkering:  
278 diversification of the nuclear receptor superfamily from a ligand-dependent ancestor. *PLoS*  
279 *Biol.* 2010;8(10):e1000497. Published 2010 Oct 5. doi:10.1371/journal.pbio.1000497.
- 280 4. Bertrand S, Brunet FG, Escriva H, Parmentier G, Laudet V, Robinson-Rechavi M.  
281 Evolutionary genomics of nuclear receptors: from twenty-five ancestral genes to derived

- 282 endocrine systems. *Mol Biol Evol.* 2004 Oct;21(10):1923-37. doi: 10.1093/molbev/msh200.  
283 Epub 2004 Jun 30. PMID: 15229292.
- 284 5. Baker ME, Funder JW, Kattoula SR. Evolution of hormone selectivity in glucocorticoid and  
285 mineralocorticoid receptors [published correction appears in *J Steroid Biochem Mol Biol.*  
286 2014 Jan;139:104]. *J Steroid Biochem Mol Biol.* 2013;137:57-70.  
287 doi:10.1016/j.jsbmb.2013.07.009.
- 288 6. Weikum ER, Knuesel MT, Ortlund EA, Yamamoto KR. Glucocorticoid receptor control of  
289 transcription: precision and plasticity via allostery. *Nat Rev Mol Cell Biol.* 2017;18(3):159-  
290 174. doi:10.1038/nrm.2016.152. doi:doi:10.1038/nrm.2016.152
- 291 7. de Kloet ER. From receptor balance to rational glucocorticoid therapy. *Endocrinology.*  
292 2014;155(8):2754-2769. doi:10.1210/en.2014-1048.
- 293 8. Gross KL, Cidlowski JA. Tissue-specific glucocorticoid action: a family affair. *Trends*  
294 *Endocrinol Metab.* 2008;19(9):331-339. doi:10.1016/j.tem.2008.07.009.
- 295 9. Bridgham JT, Carroll SM, Thornton JW. Evolution of hormone-receptor complexity by  
296 molecular exploitation. *Science.* 2006;312(5770):97-101. doi:10.1126/science.1123348.
- 297 10. Arriza JL, Weinberger C, Cerelli G, et al. Cloning of human mineralocorticoid receptor  
298 complementary DNA: structural and functional kinship with the glucocorticoid receptor.  
299 *Science.* 1987;237(4812):268-275. doi:10.1126/science.3037703.
- 300 11. Baker ME, Katsu Y. 30 YEARS OF THE MINERALOCORTICOID RECEPTOR:  
301 Evolution of the mineralocorticoid receptor: sequence, structure and function. *J Endocrinol.*  
302 2017;234(1):T1-T16. doi:10.1530/JOE-16-0661.
- 303 12. Thornton JW. Evolution of vertebrate steroid receptors from an ancestral estrogen receptor  
304 by ligand exploitation and serial genome expansions. *Proc Natl Acad Sci U S A.* 2001 May  
305 8;98(10):5671-6. doi: 10.1073/pnas.091553298. Epub 2001 May 1. PMID: 11331759;  
306 PMCID: PMC33271.
- 307 13. Osório J, Rétaux S. The lamprey in evolutionary studies. *Dev Genes Evol.* 2008  
308 May;218(5):221-35. doi: 10.1007/s00427-008-0208-1. Epub 2008 Feb 15. PMID:  
309 18274775.
- 310 14. Carroll SM, Bridgham JT, Thornton JW. Evolution of hormone signaling in elasmobranchs  
311 by exploitation of promiscuous receptors. *Mol Biol Evol.* 2008;25(12):2643-2652.  
312 doi:10.1093/molbev/msn204.
- 313 15. Katsu Y, Shariful IMD, Lin X, Takagi W, Urushitani H, Kohno S, Hyodo S, Baker ME. N-  
314 terminal Domain Regulates Steroid Activation of Elephant Shark Glucocorticoid and  
315 Mineralocorticoid Receptors. *J Steroid Biochem Mol Biol.* 2021 Feb 27:105845. doi:  
316 10.1016/j.jsbmb.2021.105845. Epub ahead of print. PMID: 33652098.

- 317 16. Inoue JG, Miya M, Lam K, et al. Evolutionary origin and phylogeny of the modern  
318 holocephalans (Chondrichthyes: Chimaeriformes): a mitogenomic perspective. *Mol Biol*  
319 *Evol.* 2010;27(11):2576-2586. doi:10.1093/molbev/msq147.
- 320 17. Venkatesh B, Lee AP, Ravi V, et al. Elephant shark genome provides unique insights into  
321 gnathostome evolution [published correction appears in *Nature*. 2014 Sep  
322 25;513(7519):574]. *Nature*. 2014;505(7482):174-179. doi:10.1038/nature12826.
- 323 18. Biscotti MA, Gerdol M, Canapa A, Forconi M, Olmo E, Pallavicini A, Barucca M, Scharl  
324 M. The Lungfish Transcriptome: A Glimpse into Molecular Evolution Events at the  
325 Transition from Water to Land. *Sci Rep.* 2016 Feb 24;6:21571. doi: 10.1038/srep21571.  
326 PMID: 26908371; PMCID: PMC4764851.
- 327 19. Meyer A, Schloissnig S, Franchini P, Du K, Woltering JM, Irisarri I, Wong WY,  
328 Nowoshilow S, Kneitz S, Kawaguchi A, Fabrizius A, Xiong P, Dechaud C, Spaink HP,  
329 Volff JN, Simakov O, Burmester T, Tanaka EM, Scharl M. Giant lungfish genome  
330 elucidates the conquest of land by vertebrates. *Nature*. 2021 Feb;590(7845):284-289. doi:  
331 10.1038/s41586-021-03198-8. Epub 2021 Jan 18. PMID: 33461212; PMCID:  
332 PMC7875771.
- 333 20. Wang K, Wang J, Zhu C, Yang L, Ren Y, Ruan J, Fan G, Hu J, Xu W, Bi X, Zhu Y, Song  
334 Y, Chen H, Ma T, Zhao R, Jiang H, Zhang B, Feng C, Yuan Y, Gan X, Li Y, Zeng H, Liu  
335 Q, Zhang Y, Shao F, Hao S, Zhang H, Xu X, Liu X, Wang D, Zhu M, Zhang G, Zhao W,  
336 Qiu Q, He S, Wang W. African lungfish genome sheds light on the vertebrate water-to-land  
337 transition. *Cell*. 2021 Feb 4:S0092-8674(21)00090-8. doi: 10.1016/j.cell.2021.01.047. Epub  
338 ahead of print. PMID: 33545087.
- 339 21. Joss JM. Lungfish evolution and development. *Gen Comp Endocrinol.* 2006 Sep  
340 15;148(3):285-9. doi: 10.1016/j.ygcen.2005.10.010. Epub 2005 Dec 7. PMID: 16337631.
- 341 22. Rossier BC. Osmoregulation during Long-Term Fasting in Lungfish and Elephant Seal: Old  
342 and New Lessons for the Nephrologist. *Nephron.* 2016;134(1):5-9. doi: 10.1159/000444307.  
343 Epub 2016 Feb 23. PMID: 26901864.
- 344 23. Joss JM, Itahara Y, Watanabe TX, Nakajima K, Takei Y. Teleost-type angiotensin is  
345 present in Australian lungfish, *Neoceratodus forsteri*. *Gen Comp Endocrinol.*  
346 1999;114(2):206-212. doi:10.1006/gcen.1999.7246.
- 347 24. Joss, J. M., D. Arnold-Reed and R. Balment. "The steroidogenic response to angiotensin II  
348 in the Australian lungfish, *Neoceratodus forsteri*." *Journal of Comparative Physiology B*  
349 164 (2004): 378-382.
- 350 25. Baker ME. Steroid receptors and vertebrate evolution. *Mol Cell Endocrinol.*  
351 2019;496:110526. doi:10.1016/j.mce.2019.110526.
- 352 26. Lifton RP, Gharavi AG, Geller DS. Molecular mechanisms of human hypertension. *Cell.*  
353 2001;104(4):545-556. doi:10.1016/s0092-8674(01)00241-0.

- 354 27. Shibata S. 30 YEARS OF THE MINERALOCORTICOID RECEPTOR: Mineralocorticoid  
355 receptor and NaCl transport mechanisms in the renal distal nephron. *J Endocrinol.*  
356 2017;234(1):T35-T47. doi:10.1530/JOE-16-0669.
- 357 28. Jaisser F, Farman N. Emerging Roles of the Mineralocorticoid Receptor in Pathology:  
358 Toward New Paradigms in Clinical Pharmacology. *Pharmacol Rev.* 2016;68(1):49-75.  
359 doi:10.1124/pr.115.011106.
- 360 29. Joëls M, de Kloet ER. 30 YEARS OF THE MINERALOCORTICOID RECEPTOR: The  
361 brain mineralocorticoid receptor: a saga in three episodes. *J Endocrinol.* 2017  
362 Jul;234(1):T49-T66. doi: 10.1530/JOE-16-0660. PMID: 28634266.
- 363 30. Katsu Y, Oana S, Lin X, Hyodo S, Baker ME. Aldosterone and dexamethasone activate  
364 African lungfish mineralocorticoid receptor: Increased activation after removal of the  
365 amino-terminal domain. *J Steroid Biochem Mol Biol.* 2022 Jan;215:106024. doi:  
366 10.1016/j.jsbmb.2021.106024. Epub 2021 Nov 10. PMID: 34774724.
- 367 31. Katsu Y, Kohno S, Oka K, Baker ME. Evolution of corticosteroid specificity for human,  
368 chicken, alligator and frog glucocorticoid receptors. *Steroids.* 2016;113:38-45.  
369 doi:10.1016/j.steroids.2016.06.005.
- 370 32. Oka K, Hoang A, Okada D, Iguchi T, Baker ME, Katsu Y. Allosteric role of the amino-  
371 terminal A/B domain on corticosteroid transactivation of gar and human glucocorticoid  
372 receptors. *J Steroid Biochem Mol Biol.* 2015;154:112-119.  
373 doi:10.1016/j.jsbmb.2015.07.025.
- 374 33. Lu NZ, Cidlowski JA. Translational regulatory mechanisms generate N-terminal  
375 glucocorticoid receptor isoforms with unique transcriptional target genes. *Mol Cell.* 2005  
376 Apr 29;18(3):331-42. doi: 10.1016/j.molcel.2005.03.025. PMID: 15866175.
- 377 34. Gross KL, Lu NZ, Cidlowski JA. Molecular mechanisms regulating glucocorticoid  
378 sensitivity and resistance. *Mol Cell Endocrinol.* 2009;300(1-2):7-16.  
379 doi:10.1016/j.mce.2008.10.001.
- 380 35. Thompson JD, Higgins DG, Gibson TJ. CLUSTAL W: improving the sensitivity of  
381 progressive multiple sequence alignment through sequence weighting, position-specific gap  
382 penalties and weight matrix choice. *Nucleic Acids Res.* 1994 Nov 11;22(22):4673-80. doi:  
383 10.1093/nar/22.22.4673. PMID: 7984417; PMCID: PMC308517.
- 384 36. Tamura K, Peterson D, Peterson N, Stecher G, Nei M, Kumar S. MEGA5: molecular  
385 evolutionary genetics analysis using maximum likelihood, evolutionary distance, and  
386 maximum parsimony methods. *Mol Biol Evol.* 2011 Oct;28(10):2731-9. doi:  
387 10.1093/molbev/msr121. Epub 2011 May 4. PMID: 21546353; PMCID: PMC3203626.
- 388 37. Lu NZ, Cidlowski JA. Glucocorticoid receptor isoforms generate transcription specificity.  
389 *Trends Cell Biol.* 2006 Jun;16(6):301-7. doi: 10.1016/j.tcb.2006.04.005. Epub 2006 May 11.  
390 PMID: 16697199.



391 38. Felsenstein J. CONFIDENCE LIMITS ON PHYLOGENIES: AN APPROACH USING  
392 THE BOOTSTRAP. *Evolution*. 1985 Jul;39(4):783-791. doi: 10.1111/j.1558-  
393 5646.1985.tb00420.x. PMID: 28561359.

394
